# Supplementary material for: Survey on Current Status and Analysis of Influencing Factors of AI Self-Efficacy, AI Anxiety Level, and AI Acceptance in the Nurse Population: A Cross-Sectional Study
Source: Research Square preprint supplement (doi:10.21203/rs.3.rs-8126097/v1), 2025-12-17
Supplement: Supplementary file 1 [file 922fc758c3d4481deb7f9d27.docx]

**Table 1: Multiple-Choice Item Options Table**

| **Item** | **（n,%）** |
| --- | --- |
| **Medical Field Problems Commonly Addressed by AI (Multiple-choice Question)** |  |
| Medical Image Recognition/Analysis | 47（10.8） |
| Intelligent Consultation/Diagnostic Assistance | 84（10.8） |
| Surgical Planning/Navigation/Robot-Assisted Surgery | 38（4.9） |
| Drug Discovery and Development | 40（5.2） |
| Intelligent EHR Processing/Analysis | 47（6.1） |
| Medical Big Data Analysis/Prediction | 65（8.4） |
| Hospital Management/Process Optimization | 72（9.3） |
| Nursing Care Planning | 179（23.1） |
| Nursing Management | 161（20.8） |
| Other | 42（5.4） |
| **Methods of AI Training Received (Multiple-choice Question)​** |  |
| In-hospital training organized by our hospital | 60（25.9） |
| External academic conferences/training sessions attended outside the hospital | 45（19.4） |
| Self-study through online courses/learning platforms | 53（22.8） |
| Product training provided by vendors | 17（7.3） |
| Peer learning and exchange among colleagues | 53（22.8） |
| Other | 4（1.7） |
| **Areas of AI Research Involved In (Multiple-choice Question)​** |  |
| Intelligent Consultation/Aided Diagnosis | 10（13.2） |
| Intelligent Nursing/Patient Management | 16（21.1） |
| Medical Image AI Analysis | 9（11.8） |
| Drug Discovery and Precision Medicine | 8（10.5） |
| Application of Surgical Robot Technology | 8（10.5） |
| Medical Big Data Analysis and Predictive Modeling | 12（15.8） |
| AI Applications in Hospital Management and Process Optimization | 11（14.5） |
| Other | 2（2.6） |

**Table 6-1: Multiple Linear Regression Analysis for Frequency of Medical AI Use**

| Variables | B | β | t | *P* |
| --- | --- | --- | --- | --- |
| constant | 48.079 |  | 12.958 | .000 |
| Every week | 14.956 | 4.790 | 3.122 | .002 |
| Every month | 14.075 | 7.349 | 1.915 | .057 |
| once a while | 14.407 | 4.319 | 3.336 | .001 |
| Never | 22.841 | 5.890 | 3.878 | .000 |
| Every day | 0 |  |  |  |

Note: R²=0.265, Adjusted R²=0.070, F-value=4.437, P<0.01.

**Table 6-2: Multiple Linear Regression Analysis for Whether Received AI Training**

| Variables | B | β | t | *P* |
| --- | --- | --- | --- | --- |
| constant | 54.304 |  | 20.925 | 0.000 |
| No | 10.274 | 0.206 | 3.243 | 0.001 |
| Yes | 0 |  |  |  |

Note: R²=0.206, Adjusted R²=0.042, F-value=10.514, *P*<0.01.

**Table 6-3: Multiple Linear Regression Analysis for Whether Participated in AI-related Research Projects​**

| Variables | B | β | t | *P* |
| --- | --- | --- | --- | --- |
| constant | 42.211 |  | 8.035 | 0.000 |
| No | 20.618 | 0. 237 | 3.766 | 0.000 |
| Yes | 0 |  |  |  |

Note: R²=0.237, Adjusted R²=0.056, F-value=14.185, *P*<0.001.

**Table 7-1: Multiple Linear Regression Analysis for Whether Participated in AI-related Research Projects​**​

| Variables | B | β | t | *P* |
| --- | --- | --- | --- | --- |
| constant | 64.684 |  | 10.233 | .000 |
| No | 15.203 | 0. 148 | 2.308 | .022 |
| Yes | 0 |  |  |  |

Note: R²=0.148, Adjusted R²=0.022, F-value=5.326, *P*<0.05.

**Table 8-1: Multiple Linear Regression Analysis for Frequency of Medical AI Use**

| Variables | B | β | t | *P* |
| --- | --- | --- | --- | --- |
| constant | 14.684 |  | 15.968 | 0.000 |
| Every week | 2.368 | 0.175 | 1.995 | 0.047 |
| Every month | 1.777 | 0.070 | .976 | 0.330 |
| once a while | 2.344 | 0.203 | 2.190 | 0.030 |
| Never | 4.876 | 0.259 | 3.340 | 0.001 |
| Every day | 0 |  |  |  |

Note: R²=0.216, Adjusted R²=0.047, F-value=2.871, *P*<0.05.

**Table 8-2: Multiple Linear Regression Analysis for Whether Received AI Training​**​

| Variables | B | β | t | *P* |
| --- | --- | --- | --- | --- |
| constant | 14.291 |  | 23.221 | 0.000 |
| No | 3.883 | 0. 318 | 5.167 | 0.000 |
| Yes | 0 |  |  |  |

Note: R²=0.318, Adjusted R²=0.101, F-value=26.701, *P*<0.001.

**Table 8-3: Multiple Linear Regression Analysis for Whether Participated in AI-related Research Projects​**

| Variables | B | β | t | *P* |
| --- | --- | --- | --- | --- |
| constant | 12.211 |  | 9.502 | .000 |
| No | 5.088 | 0. 239 | 3.800 | .000 |
| Yes | 0 |  |  |  |

Note: R²=0.239, Adjusted R²=0.057, F-value=14.436, *P*<0.001.
